# Supplementary material for: Removal of protonic doping from PEDOT:PSS by weak base for improving aluminum solid electrolytic capacitor performance
Source: Royal Society of Chemistry journal article supplement (doi:10.1039/d5ra00124b), 2025-01-01
Supplement: d5ra00124b1.pdf [file d5ra00124b1.pdf]

## Supplementary Information

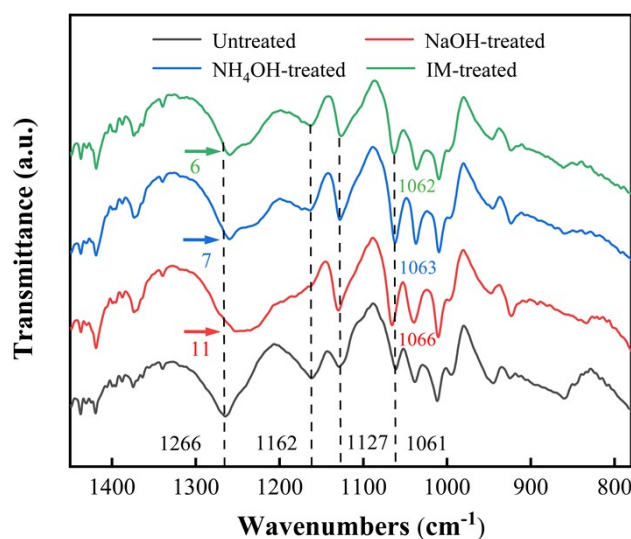

Fig.S1 ATR-FTIR spectra for untreated PEDOT:PSS films and films treated with three bases

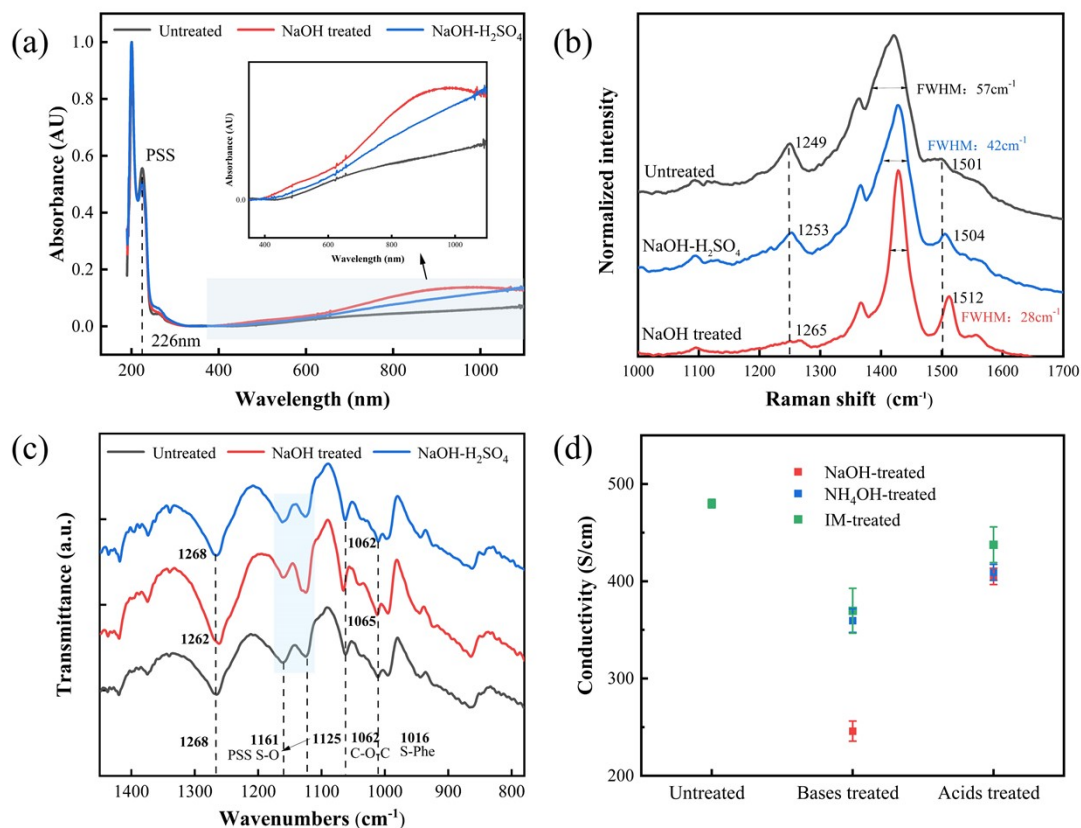

Fig.S2 Doping level characterization and conductivity of PEDOT:PSS films with acid re-treatment after bases treatment. (a) The UV absorption spectra; (b) Raman spectra measured at a 532 nm laser; (c) ATR-FTIR spectra; (d) conductivity of PEDOT:PSS films.

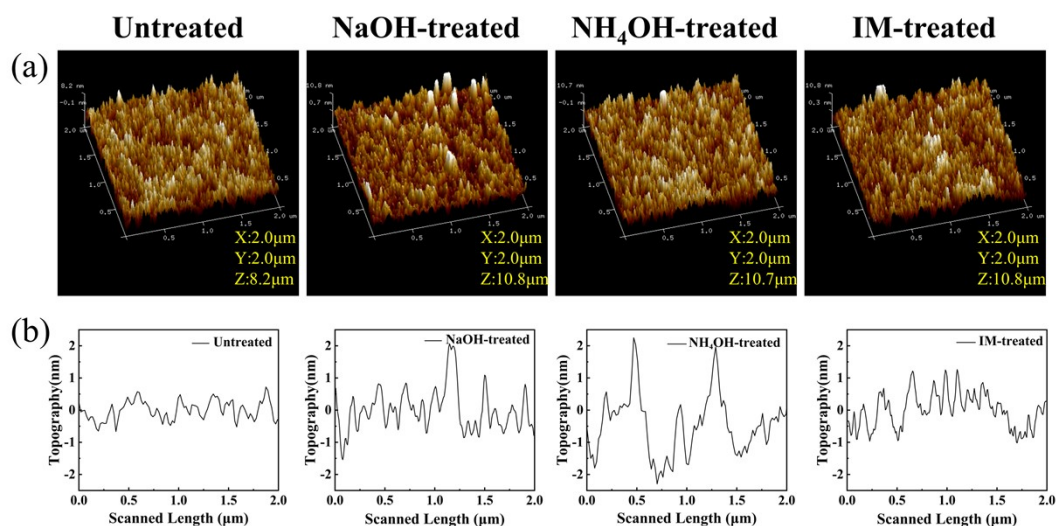

Fig.S3 (a) AFM topography images of PEDOT:PSS films; (b) Surface profiles corresponding to the topography images.

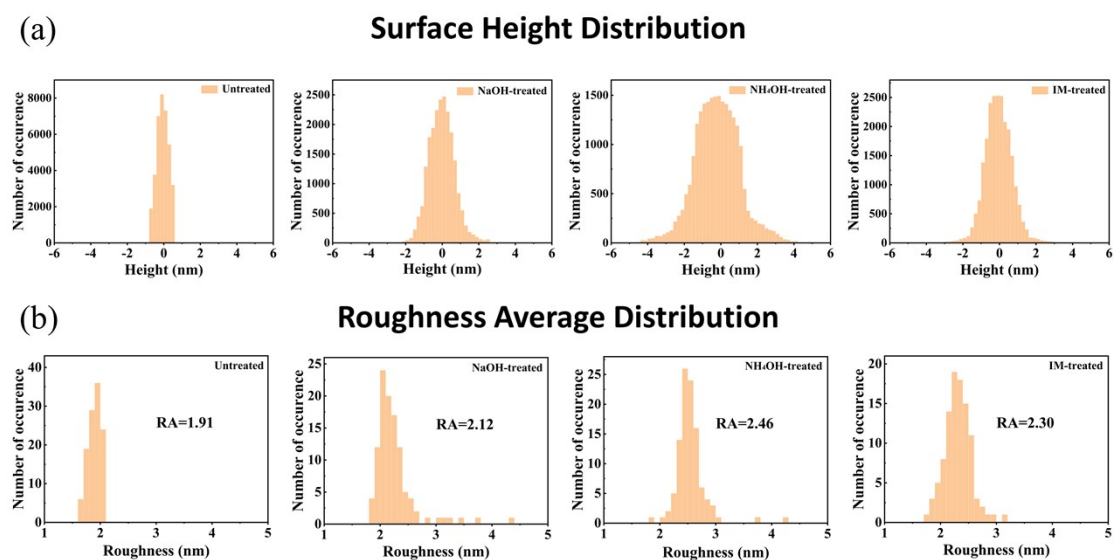

Fig.S4 (a) Surface height distribution corresponding to the images; (b) Surface roughness distribution of the films.
